# Supplementary material for: Modeling-Based Decision Support System for Radical Prostatectomy Versus External Beam Radiotherapy for Prostate Cancer Incorporating an In Silico Clinical Trial and a Cost–Utility Study
Source: MDPI journal article supplement (doi:10.3390/cancers13112687), 2021-05-29
Supplement: s1 [file s1]

## Supplementary Document IV – distribution of clinical parameters in synthetic dataset

| <i>Parameter name</i>          | <i>EBRT (SD)</i> | <i>RP (SD)</i> | <i>P</i> |
|--------------------------------|------------------|----------------|----------|
| Age (years)                    | 63.8 (10.7)      | 58.8 (9.1)     | <<0.001  |
| PSA (ng/mL)                    | 8.3 (3.5)        | 6.8 (3.5)      | <<0.001  |
| BMI (kg/m <sup>2</sup> )       | 27.9 (2.9)       | 28.0 (3.0)     | 0.81     |
| T-stage 2 (%)                  | 48.7             | 24.4           | <<0.001  |
| neg. biopsy cores (N)          | 3.7 (1.8)        | 4.8 (1.8)      | <<0.001  |
| pos. biopsy cores (N)          | 3.5 (1.7)        | 2.7 (1.4)      | <<0.001  |
| P. Gleason grade 4 (%)         | 27.1             | 3.3            | <<0.001  |
| S. Gleason grade 4 (%)         | 14.7             | 20.9           | 0.01     |
| ADT given (%)                  | 79.7             | 0              | 0.72     |
| ADT length (months)            | 9.4 (16.7)       | 0              | <<0.001  |
| ASA score >II (%)              | 86.2             | 78.9           | 0.003    |
| Nerve sparing (%)              | 12.4             | 27.5           | 0.001    |
| Abdominal surgery (%)          | 6.4              | 11.6           | 0.005    |
| HRQOL (%)                      | 82.9 (12.3)      | 76.9 (14.6)    | <<0.001  |
| Membranous urethra length (mm) | 11.8 (3.0)       | 12.1 (2.8)     | 0.04     |
| Mean Trigone dose (Gy)         | 67.2 (6.0)       | 68.4 (5.7)     | 0.001    |
| V75 rectum (%)                 | 3.8 (3.9)        | 4.5 (4.6)      | 0.008    |

EBRT: external beam radiotherapy; RP: radical prostatectomy; SD: standard deviation; PSA: prostate specific antigen; BMI: body mass index; T-stage: Tumor stage; N neg.: number of negative; N pos.: number of positive; P.: Primary; S.: Secondary; ADT: androgen deprivation therapy; ASA: American Society of Anesthesiologists; PN: Pelvic nodes; HRQOL: sexual health-related quality of life; V75: percentage receiving at least 75 Gray; Gy = Gray
