# Supplementary material for: Modeling-Based Decision Support System for Radical Prostatectomy Versus External Beam Radiotherapy for Prostate Cancer Incorporating an In Silico Clinical Trial and a Cost–Utility Study
Source: MDPI journal article supplement (doi:10.3390/cancers13112687), 2021-05-29
Supplement: s1 [file s1]

## Supplementary Document V – benchmark study including clinical parameters reported

| <i>Study</i> | <i>Treatment [N]</i> | <i>Parameters</i> |     | <i>Outcome</i> | <i>Value</i> | <i>Model</i> |
|--------------|----------------------|-------------------|-----|----------------|--------------|--------------|
| Hamdy 2016   | EBRT [545]           | Age (years)       | 62  | 5 year BDFS    | 88.5%        | 89.0%        |
|              |                      | GS 7              | 21% |                |              |              |
|              |                      | T2                | 25% |                |              |              |
|              |                      | PSA <10           | 90% |                |              |              |
|              |                      | PSA ng/ml         | 4.7 |                |              |              |
|              | RP [553]             | Age (years)       | 62  | 5 year BDFS    | 88.1%        | 87.0%        |
|              |                      | GS 7              | 21% |                |              |              |
|              |                      | T2                | 25% |                |              |              |
|              |                      | PSA <10           | 90% |                |              |              |
|              |                      | PSA ng/ml         | 4.7 |                |              |              |
| CHHiP        | 74 Gy [1065]         | Age (years)       | 69  | 5 year BDFS    | 88.5%        | 88.4%        |
|              |                      | T2                | 58% |                |              |              |
|              |                      | GS 7              | 64% |                |              |              |
|              |                      | ADT               | 83% |                |              |              |
|              |                      | ADT months        | 6.2 |                |              |              |
|              | 60 Gy [1074]         | Age (years)       | 69  | 5 year BDFS    | 91.3%        | 89.9%        |
|              |                      | T2                | 58% |                |              |              |
|              |                      | GS 7              | 63% |                |              |              |
|              |                      | ADT               | 85% |                |              |              |
|              |                      | ADT months        | 6.2 |                |              |              |
|              | 57 Gy [1077]         | Age (years)       | 69  | 5 year BDFS    | 86.8%        | 87.9%        |
|              |                      | T2                | 58% |                |              |              |
|              |                      | GS 7              | 65% |                |              |              |
|              |                      | ADT               | 84% |                |              |              |
|              |                      | ADT months        | 6.2 |                |              |              |
| Donovan 2016 | EBRT [545]           | Age (years)       | 62  | 6 month UI     | 5%           | 3.3%         |
|              |                      | GS 7              | 20% | 6 year UI      | 3.5%         | 3.3%         |
|              |                      | T2                | 21% | 6 month ED     | 77.8%        | 85.4%        |
|              |                      | PSA (ng/ml)       | 4.8 | 6 year ED      | 72.6%        | 71.6%        |
|              |                      |                   |     | 6 month RB     | 3.8%         | 14.7%        |
|              |                      |                   |     | 6 year RB      | 5.6%         | 5.7%         |
|              | RP [553]             | Age (years)       | 62  | 6 month UI     | 46%          | 41.5%        |
|              |                      | GS 7              | 22% | 6 year UI      | 17%          | 17.0%        |
|              |                      | T2                | 26% | 6 month ED     | 88%          | 92.7%        |
|              |                      | PSA (ng/ml)       | 4.9 | 6 year ED      | 83.5%        | 83.7%        |
|              |                      |                   |     |                |              |              |
|              |                      |                   |     |                |              |              |

N: number of patients; EBRT: external beam radiotherapy; RP: radical prostatectomy; BDFS: biological disease free survival; UI: urinary incontinence; ED: erectile dysfunction; RB: rectal bleeding; Gy: gray; GS: gleason score; PSA: prostate specific antigen in ng/ml; ADT: androgen deprivation therapy
