# Supplementary material for: Modeling-Based Decision Support System for Radical Prostatectomy Versus External Beam Radiotherapy for Prostate Cancer Incorporating an In Silico Clinical Trial and a Cost–Utility Study
Source: MDPI journal article supplement (doi:10.3390/cancers13112687), 2021-05-29
Supplement: s1 [file s1]

## Supplementary Document III – Distribution for the generation of synthetic dataset

| <i>Parameter name</i>          | <i>Distribution type</i> |                  |                | <i>Ref</i> |
|--------------------------------|--------------------------|------------------|----------------|------------|
| Age (years)                    | Normal                   | $\mu = 60$       | $\sigma = 10$  | [1–5]      |
| PSA (ng/mL)                    | Beta                     | $\alpha = 4.17$  | $\beta = 51.5$ | [1–5]      |
| BMI (kg/m <sup>2</sup> )       | Normal                   | $\mu = 28$       | $\sigma = 3$   | [3–5]      |
| T-stage                        | Step                     | T1 = 66%         | T2 = 34%       | [1, 3–5]   |
| neg. biopsy cores (N)          | Normal                   | $\mu = 4.5$      | $\sigma = 1.9$ | [2]        |
| pos. biopsy cores (N)          | Half normal              | Location = 1     | Scale = 2.46   | [2]        |
| P. Gleason grade               | Beta                     | 4 = 14%          | 3 = 86%        | [1, 3, 4]  |
| S. Gleason grade               | Step                     | 4 = 19%          | 3 = 71%        | [2]        |
| ADT given                      | Step                     | no = 22%         | yes = 78%      | [6]        |
| ADT length                     | Beta                     | $\alpha = 0.125$ | $\beta = 1.25$ | [1]        |
| ASA score                      | Step                     | I/II = 18%       | III/IV = 82%   | [1, 3]     |
| Nerve sparing                  | Step                     | no = 81%         | yes = 19%      | [4]        |
| Abdominal surgery              | Step                     | no = 90.3%       | yes = 9.7%     | [6]        |
| HRQOL (%)                      | Beta                     | $\alpha = 1.5$   | $\beta = 6$    | [5]        |
| Membranous urethra length (mm) | Normal                   | $\mu = 12$       | $\sigma = 3$   | [4]        |
| Mean Trigone dose (Gy)         | Normal                   | $\mu = 68$       | $\sigma = 6$   | [3]        |
| V75 rectum (%)                 | Gamma                    | location = 1     | scale = 4      | [6]        |

Ref: reference; PSA: prostate specific antigen; BMI: body mass index; T-stage: Tumor stage; N neg.: number of negative; N pos.: number of positive; P.: Primary; S.: Secondary; ADT: androgen deprivation therapy; ASA: American Society of Anesthesiologists; PN: Pelvic nodes; HRQOL: sexual health-related quality of life; V75: percentage receiving at least 75 Gray; Gy = Gray

1. Warner A, Pickles T, Crook J, et al (2015) Development of ProCaRS Clinical Nomograms for Biochemical Failure-free Survival Following Either Low-Dose Rate Brachytherapy or Conventionally Fractionated External Beam Radiation Therapy for Localized Prostate Cancer. *Cureus* 7:e276
2. Bjartell A, Bottai M, Persson J, et al (2016) Prediction of clinical progression after radical prostatectomy in a nationwide population-based cohort. *Scandinavian Journal of Urology* 50:255–259
3. Schaafe W, van der Schaaf A, van Dijk LV, et al (2018) Development of a prediction model for late urinary incontinence, hematuria, pain and voiding frequency among irradiated prostate cancer patients. *PLoS One* 13:e0197757
4. Matsushita K, Kent MT, Vickers AJ, et al (2015) Preoperative predictive model of recovery of urinary continence after radical prostatectomy. *BJU Int* 116:577–583
5. Alemozaffar M, Regan MM, Cooperberg MR, et al (2011) Prediction of erectile function following treatment for prostate cancer. *JAMA* 306:1205–1214
6. Valdagni R, Kattan MW, Rancati T, et al (2012) Is it time to tailor the prediction of radio-induced toxicity in prostate cancer patients? Building the first set of nomograms for late rectal syndrome. *Int J Radiat Oncol Biol Phys* 82:1957–1966
