# Supplementary material for: Modeling-Based Decision Support System for Radical Prostatectomy Versus External Beam Radiotherapy for Prostate Cancer Incorporating an In Silico Clinical Trial and a Cost–Utility Study
Source: MDPI journal article supplement (doi:10.3390/cancers13112687), 2021-05-29
Supplement: s1 [file s1]

## Supplementary Document II

An overview of the utility values, obtained from Steward et al. are shown in Table A 1.

*Table A 1- Utility values used in the Markov model*

| State                              | Expected value | SD   |
|------------------------------------|----------------|------|
| Post-treatment, no adverse effects | Baseline       | -    |
| ED                                 | 0.89           | 0.16 |
| UI                                 | 0.83           | 0.21 |
| RB                                 | 0.71           | 0.26 |
| UI+BT                              | 0.70           | 0.24 |
| ED+BT                              | 0.57           | 0.26 |
| ED+UI                              | 0.79           | 0.23 |
| UI+ED+BT                           | 0.45           | 0.31 |
| Recurrence                         | 0.81           | 0.18 |
| Metastatic disease                 | 0.25           | 0.11 |

ED: erectile dysfunction; UI: Urinary incontinence; RB: rectal bleeding; SD: standard deviation

An overview of the costs are shown in Table A 2

*Table A 2 - Costs used in the Markov model*

| Description                     | Mean costs (€)          | SD (€) |
|---------------------------------|-------------------------|--------|
| Open prostatectomy              | 9780                    | 978    |
| Radiotherapy                    | 8275                    | 827.5  |
|                                 | Mean costs per year (€) | SD (€) |
| Follow-up (year 1-2)            | 511                     | 30     |
| Follow-up (year >2)             | 255                     | 21     |
| Add. costs erectile dysfunction | 60                      | 9      |
| Add. costs urinary incontinence | 303                     | 21     |
| Add. costs rectal bleeding      | 95                      | 10     |
| Recurrence                      | 2535                    | 212    |
| Metastatic disease              | 2288                    | 252    |
| Castrate resistant metastasis   | 6493                    | 313    |

SD = standard deviation

These values were obtained using the care product codes of the relevant treatments. We used the costs published on <https://www.opendisdata.nl>, and we used a standard deviation of 10% of the total costs of the treatment (Table A 3).

Table A 3- costs of treatment

|                    | Total costs | Care product code    |
|--------------------|-------------|----------------------|
| Radiotherapy       | € 8275      | 990061072, 990061014 |
| Open Prostatectomy | € 9780      | 20109012             |

Costs of treatments less than € 850 were extracted using the care product code and the tariff tool developed by CZ (<https://www.cz.nl/service-en-contact/zoek-tarieven>). For post-treatment costs we assumed 4 consultations and prostate specific antigen (PSA) tests per anno in the first two years, and 2 per anno after that (Table A 4).

Table A 4- post-treatment costs

| Year             | Quantity p.a |    | Price/unit | Total costs         |                     | Care product code |
|------------------|--------------|----|------------|---------------------|---------------------|-------------------|
|                  | 1-2          | >2 |            | 1-2                 | >2                  |                   |
| Consultation fee | 4            | 2  | € 122 (15) | € 488 (30)          | € 244 (21)          | 20109088          |
| PSA test         | 4            | 2  | € 5,8      | € 23,2              | € 11,6              | 72621             |
| <b>Total</b>     |              |    |            | <b>€ 511,2 (30)</b> | <b>€ 255,6 (21)</b> |                   |

Costs of medication was taken from a website, <https://www.farmacotherapeutischkompas.nl>, that reports the costs of pharmaceutical healthcare. At the suspicion of biochemical failure or metastatic disease, a PSMA scan can be made. If recurrence has taken place, the patient can receive secondary localized treatment, or hormonal therapy. Once the patient progresses to castrate resistant metastatic disease, the patient is treated with chemotherapy (Table A 5).

Table A 5- costs metastatic disease

|                             | Quantity p. a | Price/unit (SD) | Total costs (SD)    | Care product code |
|-----------------------------|---------------|-----------------|---------------------|-------------------|
| Consultation fee specialist | 4             | € 122 (15)      | € 488 (21)          | 20109088          |
| LHRH agonist leuprorelin    | 4             | € 450 (125)     | € 1800 (250)        | 20109010          |
| Docetaxel                   | 6             | € 721 (120)     | € 4326 (294)        | 20109050          |
| Prednisolon                 | 6             | € 18            | € 108               |                   |
| PSMA-scan                   | 0,35          | € 1060 (123)    | € 371 (73)          | 120501            |
| Zoledronic acid             | 4             | € 422 (40)      | € 1688 (80)         |                   |
| <b>Total</b>                |               |                 | <b>€ 8781 (401)</b> |                   |

SD: standard deviation; p.a; per anno

For the management of late erectile dysfunction, we assumed that half the patients use medication, 10% of the patients use cavernous injections and 5% use a vacuum pump. We estimated that

medication or injections would be used on average once a month, and that the vacuum pump lasts two years (Table A 6)

Table A 6- costs of the management of erectile dysfunction

|                     | Quantity p. a | Price/unit  | Total costs     |
|---------------------|---------------|-------------|-----------------|
| Sildenafil          | 6             | € 6,83 (2)  | € 41 (5)        |
| Cavernous injection | 1,2           | € 11,06 (3) | € 13 (3)        |
| Vacuum pump         | 0,025         | € 235 (35)  | € 6 (6,5)       |
| <b>Total</b>        |               |             | <b>€ 60 (9)</b> |

For the management of late urinary incontinence, we estimate that approximately three quarters of patients use physiotherapy, with 8 sessions per year. We estimate that 90% of the patients with urinary incontinence use pads 3 times a day. We assume that 5% requires diapers once a day, and all patients who use diapers or pads require net trousers. It is estimated that 2,5% require drainage bags, of which they will require bed bags and leg bags (Table A 7). For the prices of medical products such as pads, net trousers and leg bags, we collected costs from different websites such as [www.mediqcombicare.nl](http://www.mediqcombicare.nl), [www.pharmamarket.nl](http://www.pharmamarket.nl), and [www.123drogisterij.nl](http://www.123drogisterij.nl).

Table A 7- costs of the management of urinary incontinence

|                  | Quantity p. a | Price/unit    | Total costs         |
|------------------|---------------|---------------|---------------------|
| Physiotherapy    | 1             | € 35 (0,6)    | € 35 (0,6)          |
| Balloon catheter | 0,05          | € 12 (0,3)    | € 0,6 (0,07)        |
| Pads             | 394           | € 0,36 (1)    | € 142 (20)          |
| Diapers          | 18            | € 0,65 (0,08) | € 11,7 (0,3)        |
| Net trousers     | 0,95          | € 1,25 (0,1)  | € 1,2 (0,1)         |
| Bed bag, sterile | 3             | € 20 (0,7)    | € 60 (1,2)          |
| Leg bag, sterile | 1,3           | € 40 (1)      | € 52 (1,1)          |
| <b>Total</b>     |               |               | <b>€ 302,5 (21)</b> |

Rectal bleeding is mostly treated with low cost treatments such as medication, but a low percentage has severe rectal bleeding and needs to be treated with infrared coagulation or a coloscopy (Table A 8)

Table A 8- costs of the management of rectal bleeding

|                                                       | Quantity p. a | Price/unit  | Total costs        | Care product code |
|-------------------------------------------------------|---------------|-------------|--------------------|-------------------|
| Salofalk/ Arestal                                     | 36,5          | € 1,13 (1)  | € 41 (6)           |                   |
| Sclerosis, Rubber band ligation, infrared coagulation | 0,05          | € 167 (3,8) | € 8 (0,8)          | 35135             |
| Intervention-coloscopy                                | 0,05          | € 469 (7)   | € 23,5 (1,6)       | 34697             |
| Sigmoidoscopy                                         | 0,05          | € 445 (34)  | € 22 (8)           | 34686             |
| <b>Total</b>                                          |               |             | <b>€ 94,5 (10)</b> |                   |
