# Supplementary material for: Modeling-Based Decision Support System for Radical Prostatectomy Versus External Beam Radiotherapy for Prostate Cancer Incorporating an In Silico Clinical Trial and a Cost–Utility Study
Source: Cancers (Basel). 2021 May 29;13(11):2687. doi: 10.3390/cancers13112687 (PMC8198879; doi:10.3390/cancers13112687)
Supplement: Supplementary file 1 [file cancers-13-02687-s001.zip]

Archive with 6 entries (6 files):
- Supplementary Document I.pdf
- Supplementary Document II.pdf
- Supplementary Document III.pdf
- Supplementary Document IV.pdf
- Supplementary Document V.pdf
- Supplementary Document VI.pdf
